# Supplementary material
Source: Springer Nature journal article supplement (https://www.springermedizin.de/resource/supplementary/12903_2014_409_MOESM2_ESM.pdf/9516976)

a

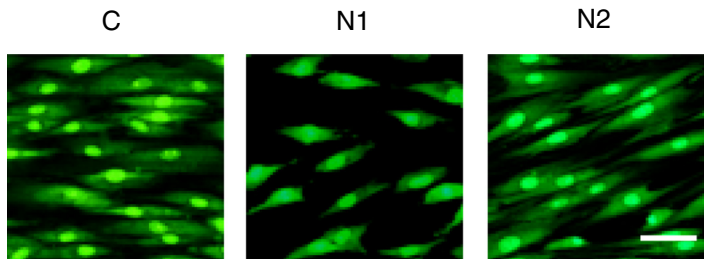

b

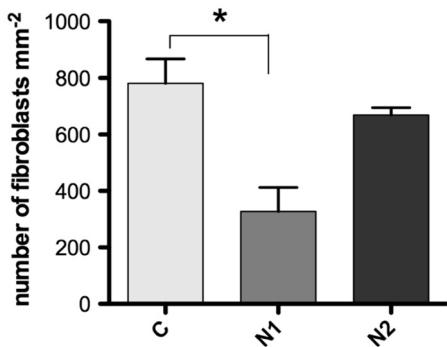

Supplement: MOESM2 [file 9516976]
